# Supplementary material for: Demonstration of temperature-sensitive paints with rigorously controlled thickness applied to variously shaped metal substrates with a highly stable connection based on a demulsification-induced fast solidification strategy
Source: Royal Society of Chemistry journal article supplement (doi:10.1039/d1nj06054f), 2022-01-01
Supplement: d1nj06054f1.pdf [file d1nj06054f1.pdf]

## Supplementary Information

**Temperature-sensitive paints with rigorously controllable thickness applied for various shape metal substrate with highly stable connection based on demulsification-induced fast solidification strategy**

Dan Wang,<sup>abc</sup> Yaokai Wang,<sup>bc</sup> Caicai He,<sup>bc</sup> Jiangyan Li,<sup>bc</sup> Ahmed Olalekan Omoniyi,<sup>abc</sup> Siyu Lu,<sup>bc</sup> Xiao Li,<sup>bc</sup> Jianfu Zhang,<sup>\*bc</sup> Jing Sun<sup>\*bc</sup> and Zhongmin Su<sup>\*abc</sup>

<sup>a</sup> School of Materials Science and Engineering, Changchun University of Science and Technology, Changchun, 130022, People's Republic of China

<sup>b</sup> School of Chemistry and Environmental Engineering, Changchun University of Science and Technology, Changchun, 130022, People's Republic of China

<sup>c</sup> Jilin Provincial Science and Technology Innovation Center of Optical Materials and Chemistry, Changchun, 130022, People's Republic of China

E-mail: zhangjianfu@cust.edu.cn; sj-cust@126.com; zmsu@nenu.edu.cn

## Videos

**Video S1.** Variation of luminescent emission intensity of WPU/PCD/Eu(DBM)<sub>3</sub>Bipy-C (2 h) TSP with increasing temperature from 25 to 85°C when excited with UV light at 254 nm.

**Video S2.** Airplane model made from Zn sheet prepared with WPU/PCD/Eu(DBM)<sub>3</sub>Bipy-C (2 h) TSP via DIFS method.

**Video S3.** Airplane model made from Zn sheet prepared with WPU/PCD/Eu(DBM)<sub>3</sub>Bipy-C (2 h) TSP via DIFS method when excited with UV light at 254 nm.

## Figures

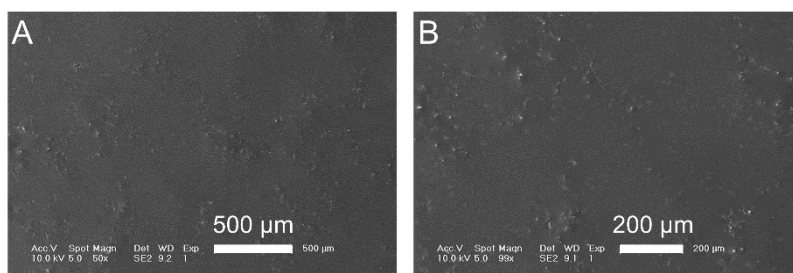

**Fig. S1** (A, B) Surface SEM images of WPU/PCD/Eu(DBM)<sub>3</sub>Bipy-C (2 h) TSP.

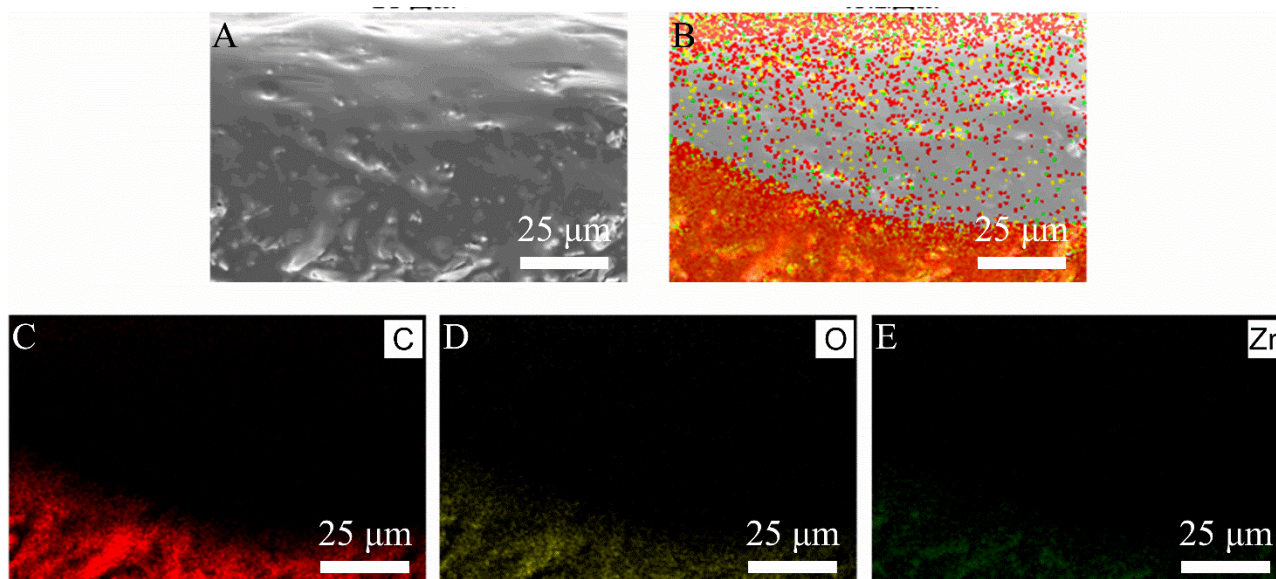

**Fig. S2** SEM and EDS elemental mapping images of the cross-section of WPU/PCD/Eu(DBM)<sub>3</sub>Bipy-C (2 h) TSP with Zn used as substrate shown in Fig. S2A: C)–E) C, O, and Zn elemental maps.

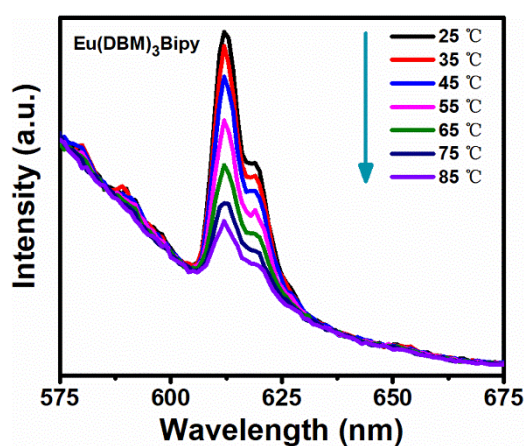

**Fig. S3** Emission spectra of the Eu(DBM)<sub>3</sub>Bipy luminescent molecular probe recorded in the temperature range of 25–85 °C at 283 nm excitation.

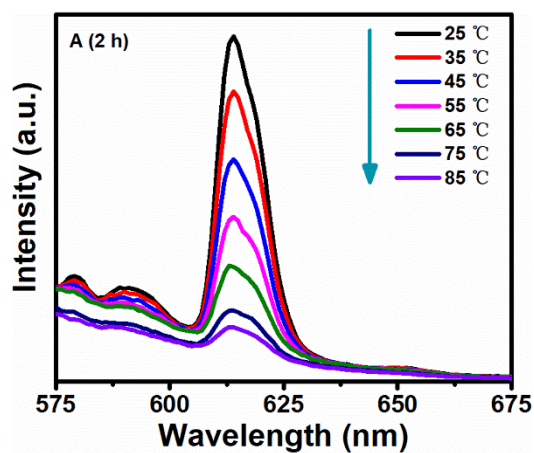

**Fig. S4** Emission spectra of the WPU/PCD/Eu(DBM)<sub>3</sub>Bipy-A (2 h) TSP recorded in the temperature range of 25-85°C at 283 nm excitation.

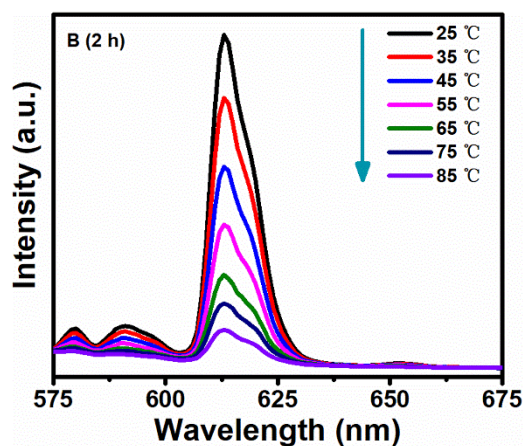

**Fig. S5** Emission spectra of the WPU/PCD/Eu(DBM)<sub>3</sub>Bipy-B (2 h) TSP recorded in the temperature range of 25-85°C at 283 nm excitation.

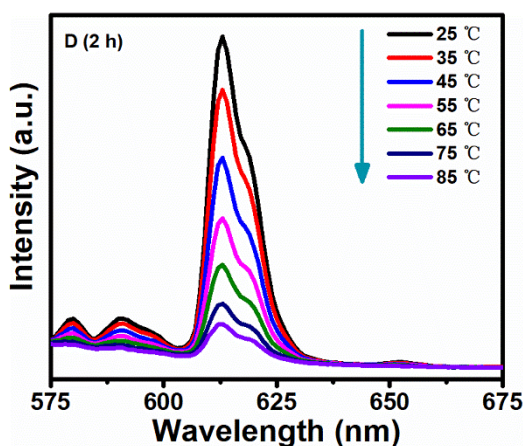

**Fig. S6** Emission spectra of the WPU/PCD/Eu(DBM)<sub>3</sub>Bipy-D (2 h) TSP recorded in the temperature range of 25-85°C at 283 nm excitation.



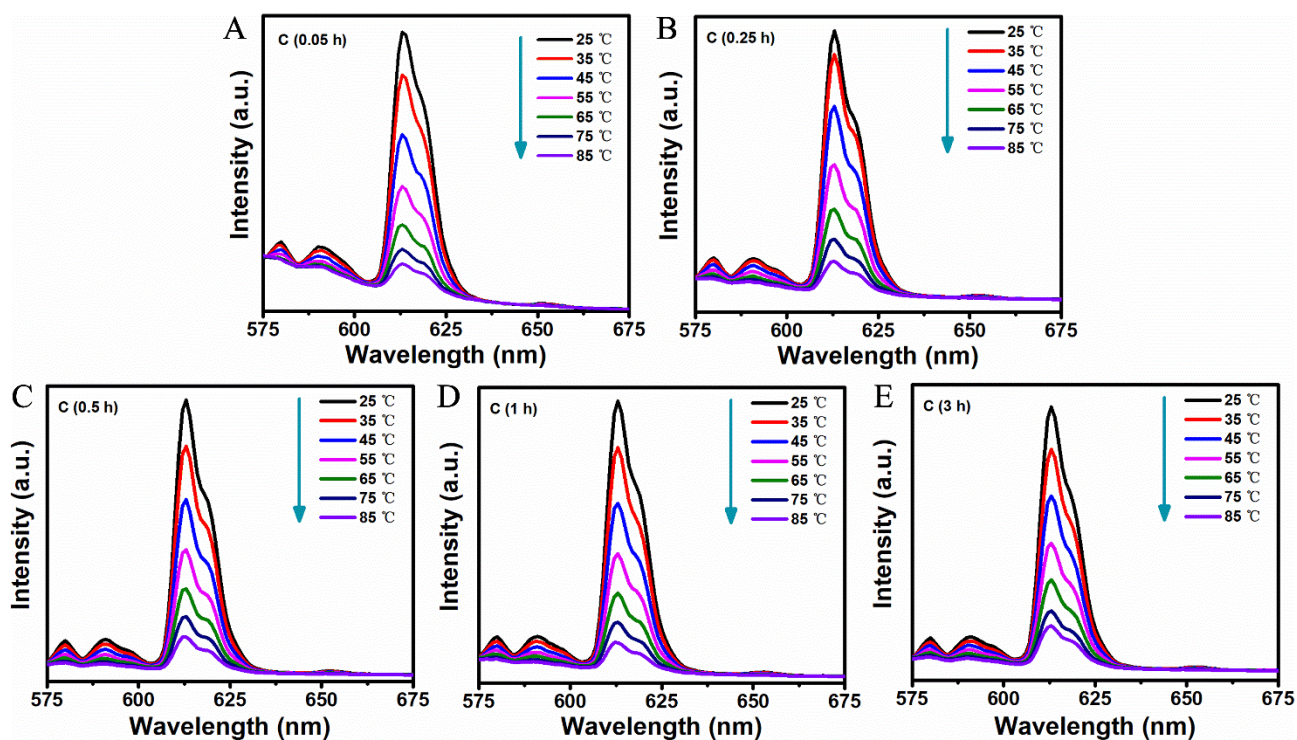

**Fig. S7** (A, B, C, D, E) Emission spectra of the WPU/PCD/Eu(DBM)<sub>3</sub>Bipy-C TSP with various conduction time (0.05 h, 0.25 h, 0.5 h, 1 h, 3 h, respectively) recorded in the temperature range of 25-85°C at 283 nm excitation.

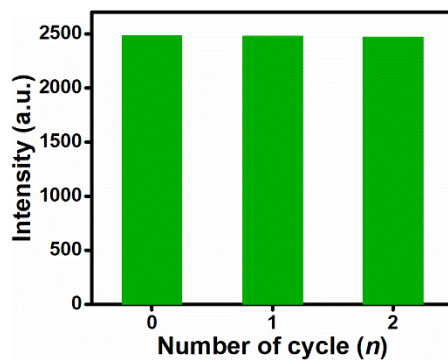

**Fig. S8** Emission intensity at 613 nm after two times temperature cycles at 283 nm excitation.

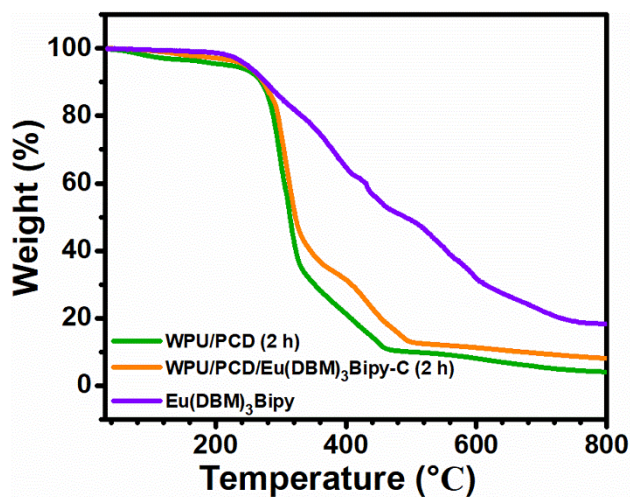

**Fig. S9** TGA curves of  $\text{Eu}(\text{DBM})_3\text{Bipy}$ , WPU/PCD (2 h) film, and WPU/PCD/ $\text{Eu}(\text{DBM})_3\text{Bipy-C}$  (2 h) TSP.

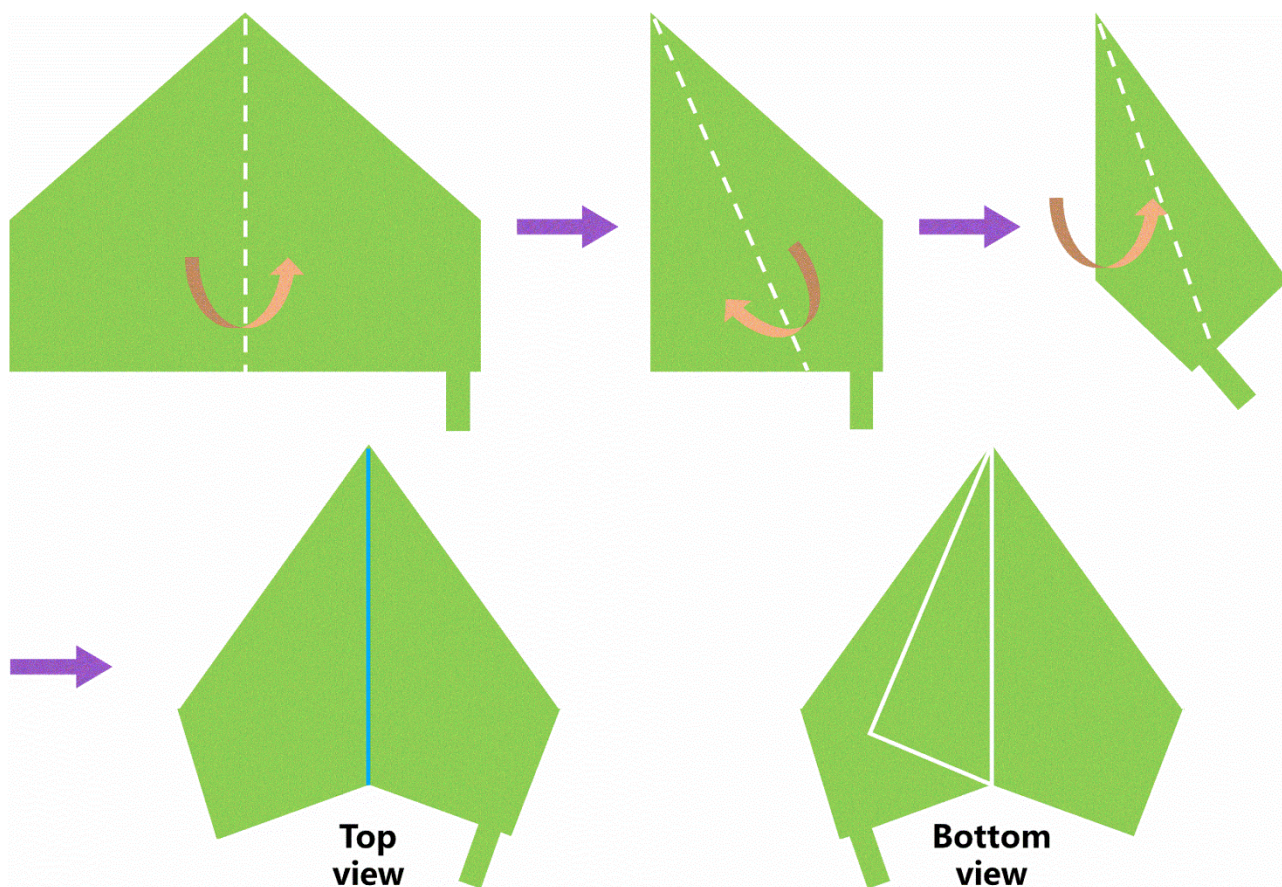

**Fig. S10** Schematic illustration for the preparation process of airplane model with Zn sheet. The appendage at the tail of the aircraft was used to connect the anode. And the cathode was parallel to the middle part (blue line) top surface.
